# Supplementary material for: Expression of novel nitrate reductase genes in the harmful alga, Chattonella subsalsa
Source: PubMed Central journal article supplement (PMC6128913; doi:10.1038/s41598-018-31735-5), 2018-09-07
Supplement: 41598_2018_31735_MOESM1_ESM.pdf [file 41598_2018_31735_MOESM1_ESM.pdf]

**Expression of novel nitrate reductase genes in the harmful alga, *Chattonella subsalsa***

Yanfei Wang<sup>1</sup>, Josée N. Bouchard<sup>2</sup>, and Kathryn J. Coyne<sup>1\*</sup>

<sup>1</sup>University of Delaware, 1044 College Drive, Lewes, DE 19958

<sup>2</sup> Algenol Biotech, 16121 Lee Rd., Suite 100, Ft. Myers, FL 33912

Email: kcoyne@udel.edu

Phone: 302-645-4236

Fax: 302-645-4007

ORCID: 0000-0001-8846-531X

**Supplementary Data S1.** Amino acid sequences of plasmids CsNR3-P2 (P2) and -P10 (P10) were aligned with NR3 sequence from Marine Microbial Eukaryote Transcriptome Sequencing Project (MMETSP). The overlapping parts in these sequences are indicated by “\*”, and the amino acids present in P2 or P10 sequence but absent in NR3 sequence from MMETSP is underlined.

```

C. subsalsa NR3 MMETSP MDAFTSRDSMKFEEMPSSNKNKLGFKPKLENXIESGSITPISQHFCTSESLISDHDIDP
C. subsalsa NR3 P2      MDAFTSRDSMKFEEMPSSNKNKLGFKPKLENLIESGSITPISQHFCTSESLISDHDIDP
C. subsalsa NR3 P10     -----
                                     -
C. subsalsa NR3 MMETSP SLLIDGAVERPNDLSVSSLTEMFQKCSFPVTLVDSGNRSNEVXGSKXHGSTWGPAGIGTS
C. subsalsa NR3 P2      SLLIDGAVERPNDLSVSSLTEMFQKCSFPVTLVDSGNRSNEVDGSKAHGSTWGPAGIGTS
C. subsalsa NR3 P10     -----
                                     -
C. subsalsa NR3 MMETSP IWSGIRLKDVLNHHVIGICDDDSNPKYIRFYSSEPDIIISTISISVTVX-DPAADVLLAVEQNG
C. subsalsa NR3 P2      IWSGIRLKDVLNHHVIGICDDDSNPKYIRFYSSEPDIIISTISISVTVVMDPAADVLLAVEQNG
C. subsalsa NR3 P10     -----
                                     -
C. subsalsa NR3 MMETSP EPLTPAHGGPLRVIVXGYVSGRSLKALRRIEVAAREADSPYHRTTNRFLPHQIDLEKALA
C. subsalsa NR3 P2      EPLTPAHGGPLRVIVPGYVSGRSLKALRRIEVAAREADSPYHRTTNRFLPHQIDLEKALA
C. subsalsa NR3 P10     -----
                                     -
C. subsalsa NR3 MMETSP DGWCDNPDTAINEFVNNSXISHPAHQIISLDKMEALPVECRGYAYSGGGRKVVRIELS
C. subsalsa NR3 P2      DGWCDNPDTAINEFVNNSVISHPAHQIISLDKMEALPVECRGYAYSGGGRKVVRIELS
C. subsalsa NR3 P10     -----
                                     -
C. subsalsa NR3 MMETSP VDDGQOTWRPCFSFSYEQQPTEAGKYWCWLWSCQVPIMEFARSKQVMVRAFDSAANTQPVVS
C. subsalsa NR3 P2      VDDGQOTWRPCFSFSYEQQPTEAGKYWCWLWSCQVPIMEFARSKQVMVRAFDSAANTQPVVS
C. subsalsa NR3 P10     -----
C. subsalsa NR3 MMETSP PTPNLLGLMNNSIYSVKIYQDFLDTAELQFEHPGHKKTMGVETEAPTATISPTHRIA---
C. subsalsa NR3 P2      PTPNLLGLMNNSIYSVKIYQDFLDTAELQFEHPGHKKTMGVETEAPTATISPTHRIA---
C. subsalsa NR3 P10     -----LDTAELQFEHPGHKKTMGVETEAPTATISPTHRIAHAS
                                     *****
C. subsalsa NR3 MMETSP -----ISAISRSNRSRRLSAPALPLASANPLTPPPLTKTFSSSSFSPPTLRKI
C. subsalsa NR3 P2      -----ISAISRSNRSRRLSAPALPLASANPLTPPPLTKTFSSSSFSPPTLRKI
C. subsalsa NR3 P10     SOEVFNNESTTAISAISRSNRSRRLSAPALPLASANPLTPPPLTKTFSSSSFSPPTLRKI
C. subsalsa NR3 MMETSP GSKGNLRGRPHALNPKKKIPFRLIGKETLSYNTIRLRFALQSPNHVGLGLPIGKHMFI SAP
C. subsalsa NR3 P2      -----GSKGNLRGRPHALNPKKKIPFRLIGKETLSYNTIRLRFALQSPNHVGLGLPIGKHMFI SAP
C. subsalsa NR3 P10     GSKGNLRGRPHALNPKKKIPFRLIGKETLSYNTIRLRFALQSPNHVGLGLPIGKHMFI SAP
C. subsalsa NR3 MMETSP IENRLCMRSYTPITGNEVDGYFDLIVKVYKDPNFAEGGKMSQFLDQLSIGQSVDVKGPL
C. subsalsa NR3 P2      -----IENRLCMRSYTPITGNEVDGYFDLIVKVYKDPNFAEGGKMSQFLDQLSIGQSVDVKGPL
C. subsalsa NR3 P10     IENRLCMRSYTPITGNEVDGYFDLIVKVYKDPNFAEGGKMSQFLDQLSIGQSVDVKGPL
C. subsalsa NR3 MMETSP GHIEYISNGNFVIHRKPFVKVNLMLAGGTGITPMFQIMKAIMEDENDETNIY MIDANNS
C. subsalsa NR3 P2      -----GHIEYISNGNFVIHRKPFVKVNLMLAGGTGITPMFQIMKAIMEDENDETNIY MIDANNS
C. subsalsa NR3 P10     GHIEYISNGNFVIHRKPFVKVNLMLAGGTGITPMFQIMKAIMEDENDETNIY MIDANNS
C. subsalsa NR3 MMETSP EKDIILYNELQQLSEQNPRQCRIWHTILTPDDPETWCYDTGYVTAEMVRDHFPRPSSQSL
C. subsalsa NR3 P2      -----EKDIILYNELQQLSEQNPRQCRIWHTILTPDDPETWCYDTGYVTAEMVRDHFPRPSSQSL
C. subsalsa NR3 P10     EKDIILYNELQQLSEQNPRQCRIWHTILTPDDPETWCYDTGYVTAEMVRDHFPRPSSQSL
C. subsalsa NR3 MMETSP VFMCGPSAMIHNACWPSLTKNGFKREMCF TF
C. subsalsa NR3 P2      -----VFMCGPSAMIHNACWPSLTKNGFKREMCF TF
C. subsalsa NR3 P10     VFMCGPSAMIHNACWPSLTKNGFKREMCF TF

```

**Supplementary Table S1.** Full-length amino acid sequences of algal nitrate reductases (NRs) from NCBI database. The key words of “algae” and “nitrate reductase” yielded 514 sequences, including the 80 full length algal NRs below.

| <b>Accession Number</b> | <b>Species</b>                              |
|-------------------------|---------------------------------------------|
| AAA11144.1              | <i>Volvox carteri</i>                       |
| AAC49459.1              | <i>Chlorella vulgaris</i>                   |
| AAC49460.1              | <i>Chlorella vulgaris</i>                   |
| AAF17595.1              | <i>Chlamydomonas reinhardtii</i>            |
| AAL79356.1              | <i>Dunaliella tertiolecta</i>               |
| AAP32278.1              | <i>Pseudochlorella pringsheimii</i>         |
| AAP75705.1              | <i>Dunaliella salina</i>                    |
| AAT72293.1              | <i>Dunaliella viridis</i>                   |
| AAT72294.1              | <i>Dunaliella viridis</i>                   |
| AAV66996.1              | <i>Phaeodactylum tricornutum</i>            |
| AAV59538.1              | <i>Cylindrotheca fusiformis</i>             |
| ABJ91208.4              | <i>Chlorella vulgaris</i>                   |
| ABO98391.1              | <i>Ostreococcus lucimarinus</i> CCE9901     |
| ABP97095.1              | <i>Chlorella vulgaris</i>                   |
| ACF22999.1              | <i>Chlorella vulgaris</i>                   |
| ACO68770.1              | <i>Micromonas commoda</i>                   |
| ACS44801.1              | <i>Heterosigma akashiwo</i>                 |
| ACX31652.1              | <i>Gracilaria tenuistipitata</i>            |
| ACX31653.1              | <i>Gracilaria tenuistipitata</i>            |
| AER70124.1              | <i>Heterosigma akashiwo</i>                 |
| AER70125.1              | <i>Heterosigma akashiwo</i>                 |
| AET85052.1              | <i>Nannochloropsis</i> sp. W2J3B            |
| AGC97428.1              | <i>Dunaliella salina</i>                    |
| ASV49153.1              | <i>Ulva prolifera</i>                       |
| ASV49154.1              | <i>Ulva prolifera</i>                       |
| BAM79553.1              | <i>Cyanidioschyzon merolae</i> strain 10D   |
| CAA45497.1              | <i>Volvox carteri</i> f. <i>nagariensis</i> |
| CBN78746.1              | <i>Ectocarpus siliculosus</i>               |
| CBX85127.1              | <i>Chlorella vulgaris</i>                   |
| CBX85132.1              | <i>Cylindrotheca fusiformis</i>             |
| CBX85140.1              | <i>Phaeodactylum tricornutum</i>            |
| CBX85141.1              | <i>Dunaliella viridis</i>                   |
| CBX85149.1              | <i>Dunaliella salina</i>                    |
| CBX85151.1              | <i>Pseudochlorella pringsheimii</i>         |

| <b>Accession Number</b> | <b>Species</b>                               |
|-------------------------|----------------------------------------------|
| CBX85159.1              | <i>Dunaliella tertiolecta</i>                |
| CBX85170.1              | <i>Chlamydomonas reinhardtii</i>             |
| CBX85213.1              | <i>Volvox carteri</i>                        |
| CCO14816.1              | <i>Bathycoccus prasinus</i>                  |
| CDF34669.1              | <i>Chondrus crispus</i>                      |
| CDF34670.1              | <i>Chondrus crispus</i>                      |
| DAA12507.1              | <i>Emiliana huxleyi</i> CCMP1516             |
| EDP00805.1              | <i>Chlamydomonas reinhardtii</i>             |
| EEC44781.1              | <i>Phaeodactylum tricornutum</i> CCAP 1055/1 |
| EED88244.1              | <i>Thalassiosira pseudonana</i> CCMP1335     |
| EEH58272.1              | <i>Micromonas pusilla</i> CCMP1545           |
| EFJ43675.1              | <i>Volvox carteri f. nagariensis</i>         |
| EFN52691.1              | <i>Chlorella variabilis</i>                  |
| EIE21865.1              | <i>Coccomyxa subellipsoidea</i> C-169        |
| EJK46860.1              | <i>Thalassiosira oceanica</i>                |
| GAQ91960.1              | <i>Klebsormidium nitens</i>                  |
| GAX09430.1              | <i>Fistulifera solaris</i>                   |
| GAX24857.1              | <i>Fistulifera solaris</i>                   |
| KIZ05991.1              | <i>Monoraphidium neglectum</i>               |
| KOO21257.1              | <i>Chrysochromulina sp.</i> CCMP291          |
| KXZ49738.1              | <i>Gonium pectorale</i>                      |
| OEU19735.1              | <i>Fragilariopsis cylindrus</i> CCMP1102     |
| OLP85491.1              | <i>Symbiodinium microadriaticum</i>          |
| OLP86515.1              | <i>Symbiodinium microadriaticum</i>          |
| OLP86534.1              | <i>Symbiodinium microadriaticum</i>          |
| OLP89482.1              | <i>Symbiodinium microadriaticum</i>          |
| OLP99244.1              | <i>Symbiodinium microadriaticum</i>          |
| OLQ12636.1              | <i>Symbiodinium microadriaticum</i>          |
| OSX81470.1              | <i>Porphyra umbilicalis</i>                  |
| OUS43413.1              | <i>Ostreococcus tauri</i>                    |
| XP_001420098.1          | <i>Ostreococcus lucimarinus</i> CCE9901      |
| XP_001696697.1          | <i>Chlamydomonas reinhardtii</i>             |
| XP_002183599.1          | <i>Phaeodactylum tricornutum</i> CCAP 1055/1 |
| XP_002294410.1          | <i>Thalassiosira pseudonana</i> CCMP1335     |
| XP_002507512.1          | <i>Micromonas commoda</i>                    |
| XP_002955156.1          | <i>Volvox carteri f. nagariensis</i>         |
| XP_003058321.1          | <i>Micromonas pusilla</i> CCMP1545           |
| XP_005535839.1          | <i>Cyanidioschyzon merolae</i> strain 10D    |

| <b>Accession Number</b> | <b>Species</b>                              |
|-------------------------|---------------------------------------------|
| XP_005646409.1          | <i>Coccomyxa subellipsoidea</i> C-169       |
| XP_005714488.1          | <i>Chondrus crispus</i>                     |
| XP_005714489.1          | <i>Chondrus crispus</i>                     |
| XP_005844793.1          | <i>Chlorella variabilis</i>                 |
| XP_007514576.1          | <i>Bathycoccus prasinus</i>                 |
| XP_013905010.1          | <i>Monoraphidium neglectum</i>              |
| P36841.1                | <i>Volvox carteri</i> f. <i>nagariensis</i> |
| XP_003081526.1          | <i>Ostreococcus tauri</i>                   |

**Supplementary Table S2.** Location and surface accessibility of potential 14-3-3 binding motifs in algal NRs predicted by Scansite 3 (Obenauer et al. 2003).

| <b>Species</b>                   | <b>Location</b> | <b>Surface accessibility</b> |
|----------------------------------|-----------------|------------------------------|
| <i>Chattonella subsalsa</i> NR3  | hinge 1 region  | 0.7828                       |
| <i>Klebsormidium nitens</i>      | hinge 1 region  | 1.6                          |
| <i>Klebsormidium nitens</i>      | hinge 2 region  | 0.49                         |
| <i>Emiliana huxleyi</i>          | hinge 2 region  | 0.5                          |
| <i>Porphyra umbilicalis</i>      | hinge 1 region  | 1.68                         |
| <i>Gracilaria tenuistipitata</i> | hinge 1 region  | 0.8526                       |
| <i>Chondrus crispus</i>          | hinge 1 region  | 1.0043                       |
